# Supplementary material for: Aminopyrene functionalized reduced graphene oxide as a supercapacitor electrode
Source: Royal Society of Chemistry journal article supplement (doi:10.1039/c5ra02578h), 2015-01-01
Supplement: c5ra02578h1.pdf [file c5ra02578h1.pdf]

# **Aminopyrene Functionalized Reduced Graphene Oxide as Supercapacitor Electrode**

**Ellie Yi Lih Teo <sup>a</sup>, Hong Ngee Lim <sup>b</sup>, Rajan Jose <sup>a</sup>, Kwok Feng Chong <sup>a,\*</sup>**

<sup>a</sup> Faculty of Industrial Sciences & Technology, Universiti Malaysia Pahang, Lebuhraya Tun Razak, 26300 Gambang, Kuantan, Pahang Darul Makmur, Malaysia

<sup>b</sup> Department of Chemistry, Faculty of Science, Universiti Putra Malaysia, 43400 UPM Serdang, Selangor, Malaysia.

\*Author for correspondence: (email: [ckfeng@ump.edu.my](mailto:ckfeng@ump.edu.my); Tel.: +609 5492403; Fax: +609 5492766)

**SUPPLEMENTARY DATA**

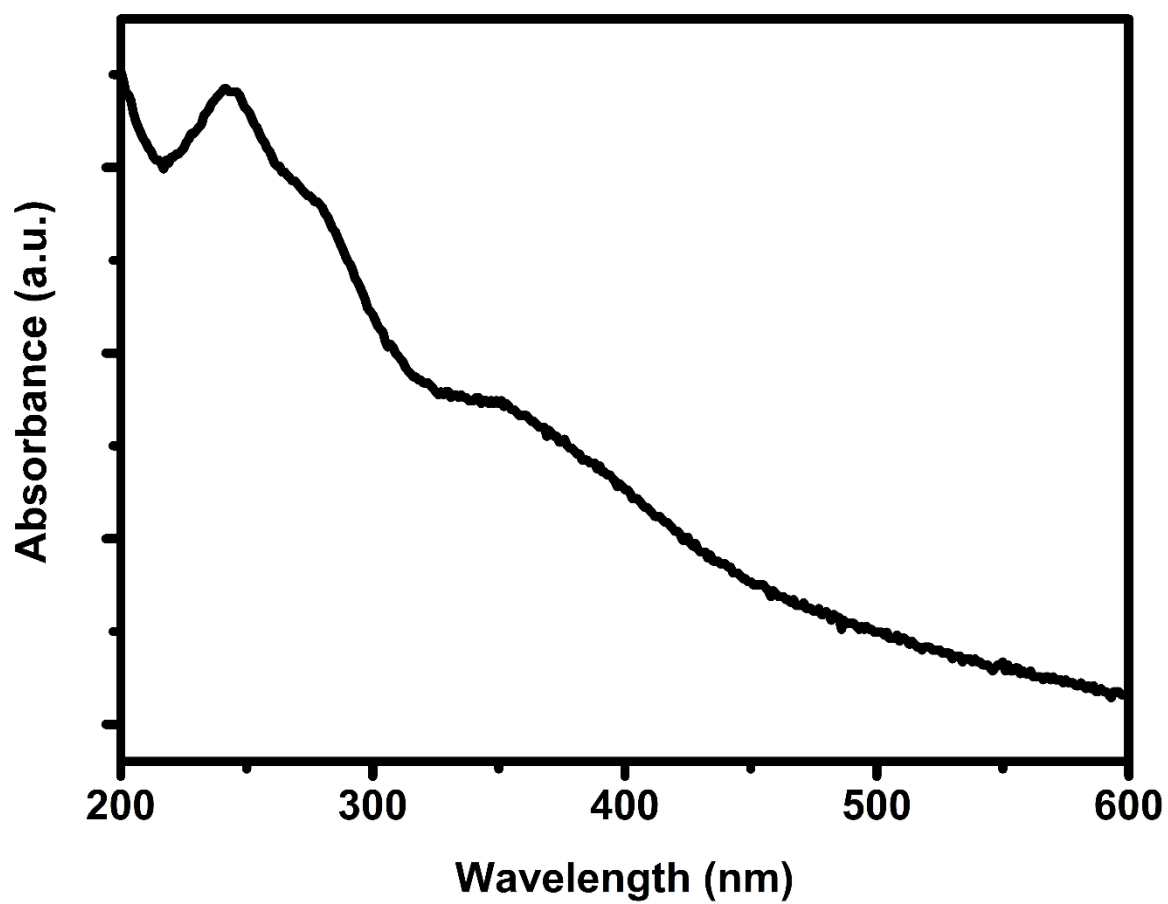

**Figure S1** UV-Vis spectrum of filtrate shows the presence of 1-aminopyrene which indicates excessive 1-aminopyrene in the functionalization process.

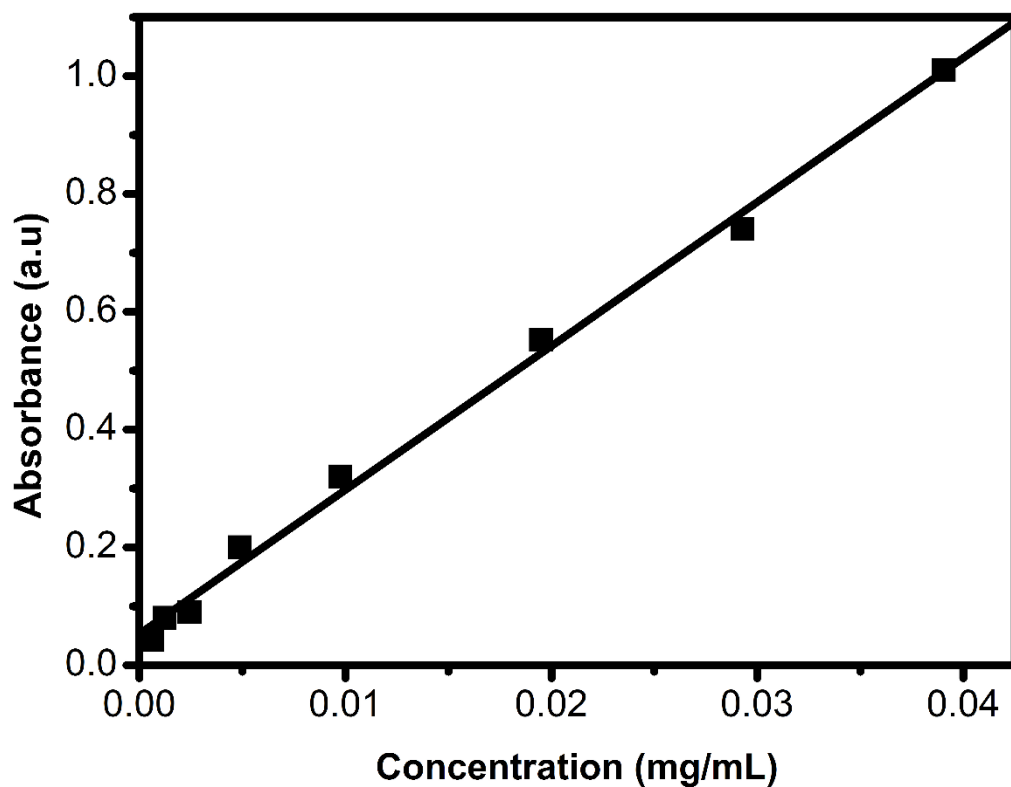

**Figure S2** Calibration curve of series of 1-aminopyrene solutions for the quantification of aminopyrene in Ap-rGO.

**Calculation:**

20 mL of Ap-rGO solution (0.12 mg/mL) was prepared for quantification.

Absorbance for Ap-rGO solution = 0.199

Concentration of aminopyrene in Ap-rGO (from calibration curve) = 0.00601 mg/mL

Mass of aminopyrene in Ap-rGO = 0.00601 mg/mL  $\times$  20 mL = 0.1202 mg

Wt.% of aminopyrene in Ap-rGO = [0.1202 mg / (0.12 mg/mL  $\times$  20 mL)]  $\times$  100 % = 5 %

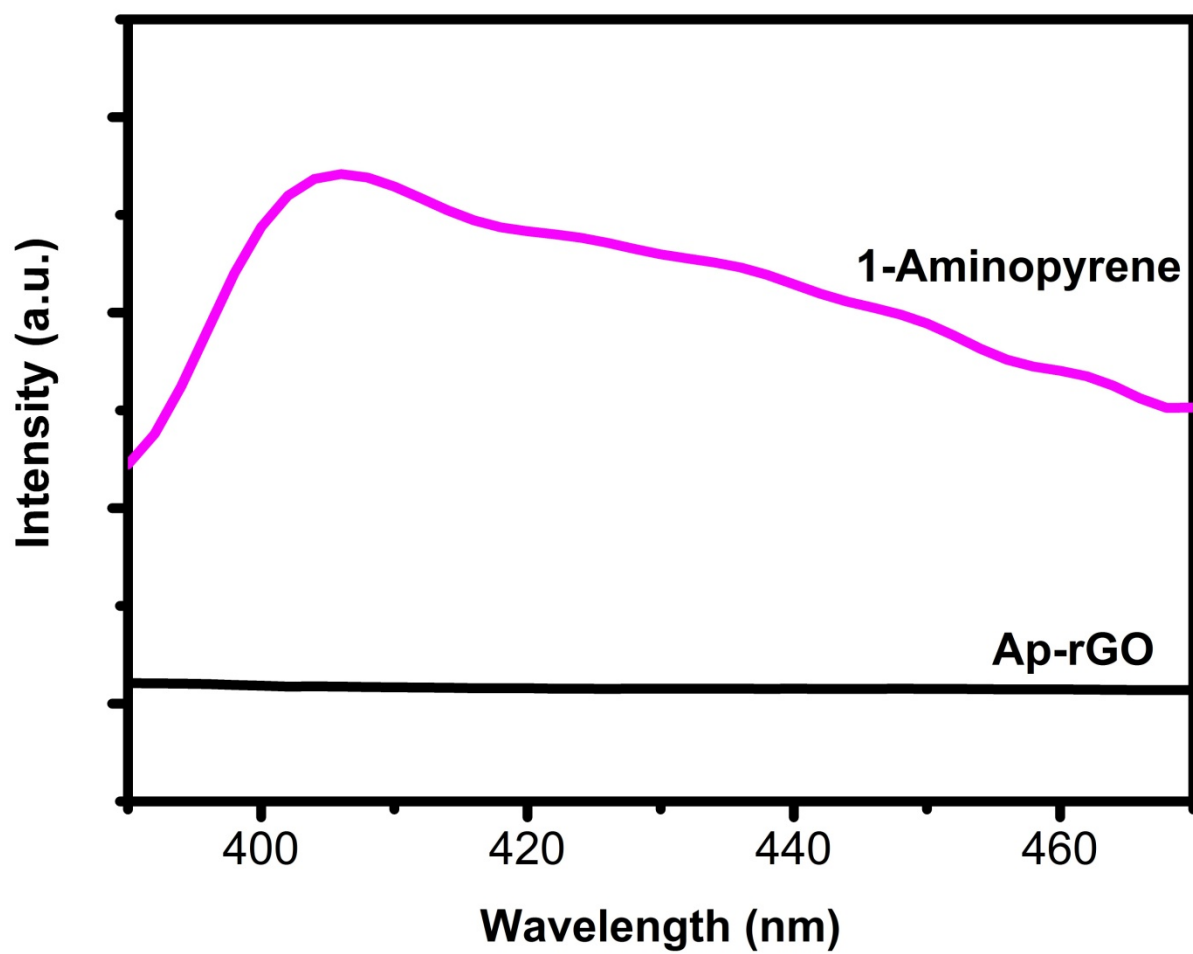

**Figure S3** Fluorescence spectra of 1-aminopyrene and Ap-rGO at 356 nm excitation wavelength.

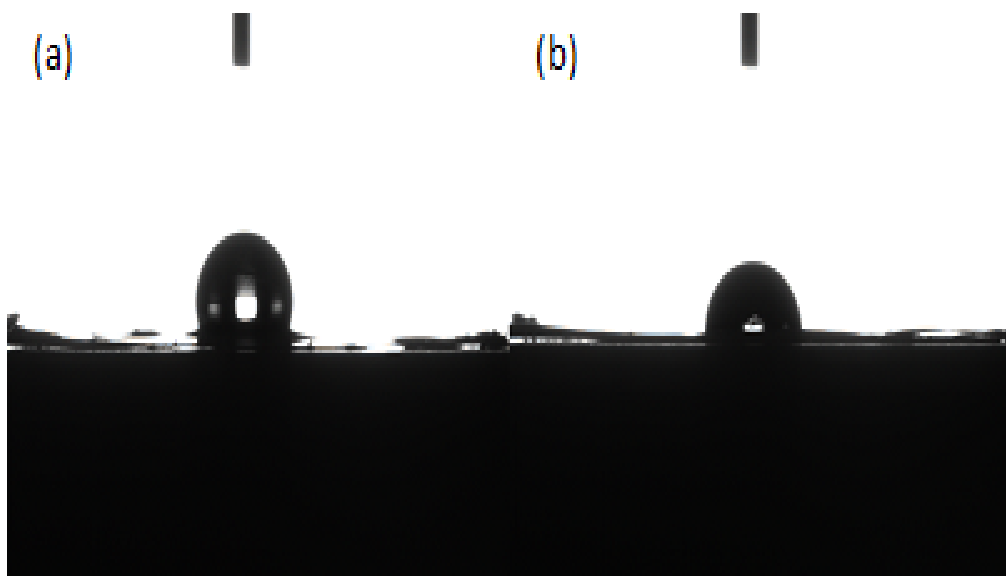

**Figure S4** Contact angle testing for (a) rGO and (b) Ap-rGO.

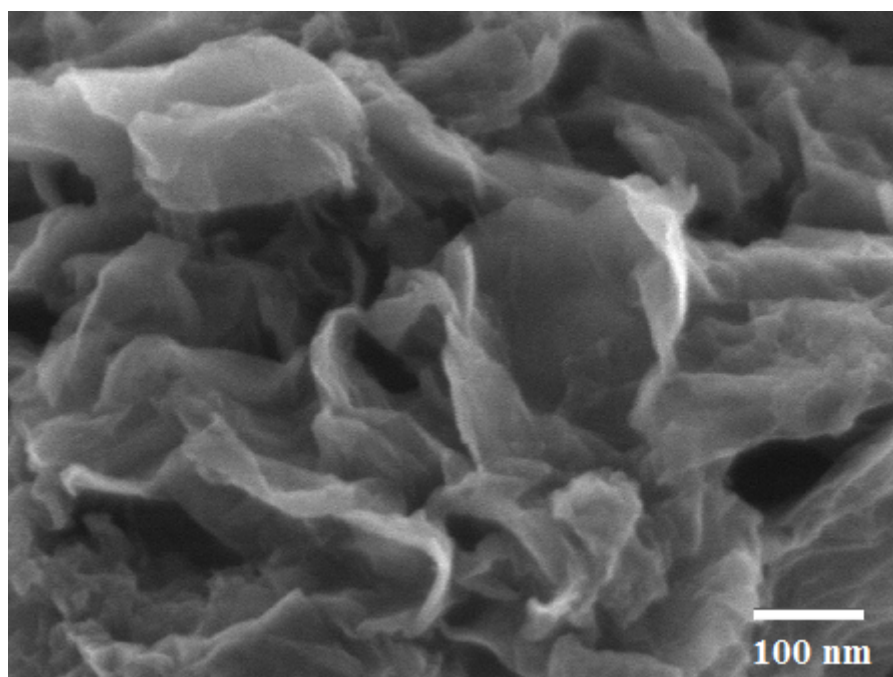

**Figure S5** FESEM image of Ap-rGO.
